# Supplementary material
Source: publisher figshare collection journal article supplement (https://acs.figshare.com/ndownloader/files/3991693)
Supplement: Supplementary file 1 [file 3991693]

## Supplementary Information

### Design, Synthesis and Activity of a Series of Arylpyrid-3-ylmethanones as Type I Positive Allosteric Modulators of $\alpha 7$ Nicotinic Acetylcholine Receptors

Derk J. Hogenkamp, Thomas A. Ford-Hutchinson, Wen-Yen Li, Edward R. Whittemore, Ryan F. Yoshimura, Minhtam B. Tran, Timothy B. C. Johnstone, Gavin D. Bascom, Hannah Rollins, Lena Lu and Kelvin W. Gee

| Table of Contents                                      | Page |
|--------------------------------------------------------|------|
| Elemental Analyses                                     | S2   |
| 95% Confidence Intervals for Electrophysiological Data | S4   |
| Conformational Analyses                                | S5   |
| References                                             | S6   |

**Table of elemental analyses.**

| Elemental Analyses |              |          |          |              |          |          |
|--------------------|--------------|----------|----------|--------------|----------|----------|
|                    | Found        |          |          | Calculated   |          |          |
| Compound           | <i>C</i>     | <i>H</i> | <i>N</i> | <i>C</i>     | <i>H</i> | <i>N</i> |
| <b>7a</b>          | 69.68        | 5.65     | 6.79     | 69.95        | 5.87     | 7.09     |
| <b>7aa</b>         | <b>68.58</b> | 5.12     | 7.14     | <b>69.10</b> | 5.27     | 7.33     |
| <b>7b</b>          | 71.68        | 5.36     | 7.84     | 71.98        | 5.47     | 8.00     |
| <b>7c</b>          | 73.03        | 5.92     | 7.29     | 73.00        | 6.13     | 7.40     |
| <b>7d</b>          | 70.99        | 6.54     | 6.36     | 70.99        | 6.43     | 6.62     |
| <b>7e</b> ·1/2MeOH | 66.88        | 4.34     | 5.64     | 66.73        | 4.68     | 5.66     |
| <b>7f</b>          | 76.84        | 6.81     | 7.18     | 76.98        | 7.00     | 7.48     |
| <b>7g</b>          | 72.84        | 5.83     | 7.34     | 73.00        | 6.13     | 7.40     |
| <b>7h</b> ·1/2MeOH | 71.68        | 6.03     | 7.17     | 71.55        | 6.39     | 7.10     |
| <b>7i</b>          | 76.45        | 5.77     | 6.16     | 76.34        | 5.72     | 6.36     |
| <b>7j</b>          | 65.38        | 4.76     | 7.16     | 65.46        | 4.71     | 7.27     |
| <b>7k</b>          | 71.75        | 5.36     | 7.68     | 71.58        | 5.15     | 7.95     |
| <b>7l</b>          | 63.12        | 4.27     | 6.63     | 63.16        | 4.34     | 6.70     |
| <b>7m</b>          | 76.41        | 6.41     | 7.23     | 76.57        | 6.69     | 7.44     |
| <b>7n</b>          | 76.04        | 5.39     | 6.74     | 76.04        | 5.44     | 6.57     |
| <b>7o</b>          | 69.74        | 5.80     | 6.89     | 70.02        | 5.88     | 7.10     |
| <b>7p</b>          | 68.01        | 4.78     | 7.88     | 68.09        | 4.86     | 7.94     |
| <b>7q</b>          | 68.86        | 5.20     | 7.63     | 68.76        | 5.22     | 7.64     |
| <b>7r</b>          | 69.27        | 5.68     | 7.11     | 69.38        | 5.56     | 7.36     |
| <b>7s</b>          | 69.67        | 5.58     | 6.91     | 69.95        | 5.87     | 7.09     |
| <b>7t</b>          | 64.62        | 5.30     | 6.28     | 64.34        | 5.16     | 6.52     |
| <b>7u</b>          | 73.03        | 6.11     | 7.43     | 73.00        | 6.13     | 7.40     |

|                |       |      |      |       |      |      |
|----------------|-------|------|------|-------|------|------|
| <b>7v</b>      | 69.59 | 5.40 | 6.94 | 69.68 | 5.59 | 7.07 |
| <b>7w</b>      | 69.72 | 5.39 | 7.03 | 69.68 | 5.59 | 7.07 |
| <b>7x</b>      | 69.83 | 5.34 | 6.85 | 69.68 | 5.59 | 7.07 |
| <b>7y</b>      | 76.44 | 6.55 | 7.77 | 76.64 | 6.71 | 7.77 |
| <b>7z·MeOH</b> | 66.39 | 5.39 | 7.03 | 65.99 | 5.54 | 7.00 |

## Electrophysiology

95% Confidence intervals for compounds tested in *Xenopus* oocytes expressing human  $\alpha 7$  nAChR's. ND is not determined and IA is inactive.

| Compound   | Potency ( $\mu$ M) |                  |              | Efficacy (% over control) |             |              |
|------------|--------------------|------------------|--------------|---------------------------|-------------|--------------|
|            | Lower 95% CI       | EC <sub>50</sub> | Upper 95% CI | Lower 95% CI              | Maximum     | Upper 95% CI |
| <b>7a</b>  | 0.05               | <b>0.14</b>      | 0.42         | 415                       | <b>592</b>  | 767          |
| <b>7aa</b> | 2.3                | <b>4.9</b>       | 10.4         | 273                       | <b>468</b>  | 662          |
| <b>7b</b>  | 1.1                | <b>1.9</b>       | 3.2          | 454                       | <b>625</b>  | 793          |
| <b>7c</b>  | -                  | <b>ND</b>        | -            | 19                        | <b>37</b>   | 55           |
| <b>7d</b>  | -                  | <b>ND</b>        | -            | 30                        | <b>55</b>   | 79           |
| <b>7e</b>  |                    | <b>ND</b>        |              |                           | <b>IA</b>   |              |
| <b>7f</b>  |                    | <b>ND</b>        |              |                           | <b>IA</b>   |              |
| <b>7g</b>  | 0.04               | <b>0.13</b>      | 0.40         | 363                       | <b>586</b>  | 808          |
| <b>7h</b>  | 0.23               | <b>0.45</b>      | 0.90         | 524                       | <b>678</b>  | 831          |
| <b>7i</b>  | -                  | <b>ND</b>        | -            | -                         | <b>IA</b>   | -            |
| <b>7j</b>  | -                  | <b>ND</b>        | -            | -10                       | <b>38</b>   | 85           |
| <b>7k</b>  | 0.09               | <b>0.22</b>      | 0.53         | 230                       | <b>305</b>  | 381          |
| <b>7l</b>  | -                  | <b>ND</b>        | -            | 39                        | <b>55</b>   | 72           |
| <b>7m</b>  | -                  | <b>ND</b>        | -            | 8                         | <b>24</b>   | 40           |
| <b>7n</b>  | -                  | <b>ND</b>        | -            | 20                        | <b>28</b>   | 37           |
| <b>7o</b>  | -                  | <b>ND</b>        | -            | -19                       | <b>42</b>   | 126          |
| <b>7p</b>  | 1.4                | <b>2.5</b>       | 4.4          | 326                       | <b>496</b>  | 666          |
| <b>7q</b>  | 0.21               | <b>0.38</b>      | 0.67         | 987                       | <b>1220</b> | 1452         |
| <b>7r</b>  | 0.06               | <b>0.16</b>      | 0.41         | 520                       | <b>679</b>  | 837          |
| <b>7s</b>  | -                  | <b>ND</b>        | -            | -5                        | <b>35</b>   | 74           |
| <b>7t</b>  | -                  | <b>ND</b>        | -            | 18                        | <b>38</b>   | 58           |
| <b>7u</b>  | -                  | <b>ND</b>        | -            | 80                        | <b>130</b>  | 180          |
| <b>7v</b>  | 0.06               | <b>0.14</b>      | 0.33         | 1003                      | <b>1300</b> | 1598         |
| <b>7w</b>  | 0.55               | <b>3.00</b>      | 17.00        | 34                        | <b>204</b>  | 373          |
| <b>7x</b>  | -                  | <b>ND</b>        | -            | 98                        | <b>132</b>  | 165          |
| <b>7y</b>  | 0.05               | <b>0.21</b>      | 0.77         | 197                       | <b>302</b>  | 406          |
| <b>7z</b>  | 0.48               | <b>0.67</b>      | 0.92         | 1603                      | <b>1825</b> | 2048         |

**Adiabatic Potential Energy Calculations.** Structural mol2 files were generated using MarvinSketch (Marvin) and all chemical parameters and topology files were generated using SwissParam<sup>1</sup> for use in CHARMM<sup>2</sup>. All structures were solvated in a 20x30x20 Å waterbox and minimized extensively. Constraints were added to mimic hydrogen bonding patterns observed in NMR data. The dihedral angle  $\psi$  was defined and constrained to 720 values (per structure) at 0.5° increments and minimized extensively at each point. Finally, the adiabatic potential energy of each point was graphed and fitted to 10<sup>th</sup> degree polynomials and baselines were subtracted for clarity. The adiabatic potential energy for compounds **7u**, **7y** and **7z** as a function of the dihedral angle ( $\psi$ ) between the aryl ring of the benzoyl group and the pyridine ring were calculated (see Figure 1). While not a true free energy, this calculation reveals the position of energy barriers in reference to conformational changes while estimating the height and feature of each barrier. The calculation suggests that the three structures do not adopt significantly different dihedral angles with a near equivalent energy minimum at around -50° or 150°. However, the 2-fluorobenzoyl, **7u**, does have a higher energy barrier for free rotation. This suggests that **7u** may lack activity based on a lack of free rotation around the benzoyl due to the large barrier relative to **7y** and **7z**.<sup>3,4</sup>

Figure 1. Calculated adiabatic potential energy for rotation about the dihedral angle ( $\psi$ ) between the aryl ring of the benzoyl group and the pyridine ring.

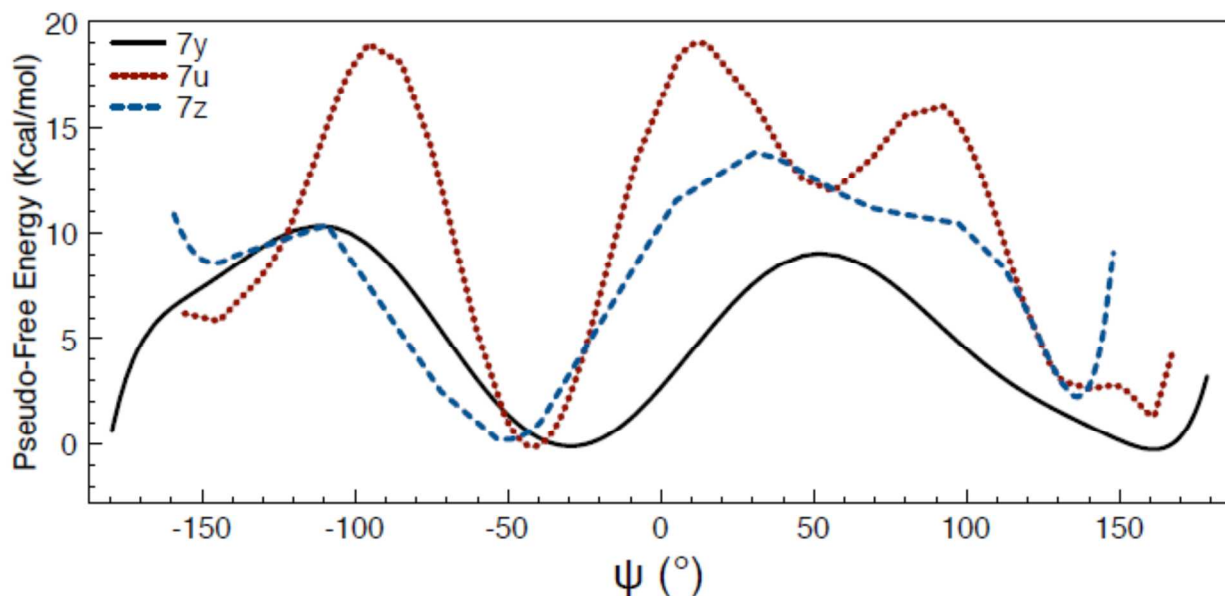

## References

- (1) Zoete, V.; Cuendet, M. A.; Grosdidier, A.; Michielin, O. SwissParam: a Fast Force Field Generation Tool for Small Organic Molecules. *J. Comput. Chem.* **2011**, *32*, 2359-2368.
- (2) Brooks, B. R.; Brucoleri, R. E.; Olafson, B. D.; States, D. J.; Swaminathan, S.; Karplus, M. CHARMM - a Program for Macromolecular Energy, Minimization, and Dynamics Calculations. *J. Comput. Chem.* **1983**, *4*, 187-217.
- (3) Bock, E.; Tomchuk, E. Electric Moments and Conformations of ortho-, meta-, and para-Fluorobenzaldehyde. *Can. J. Chem.* **1972**, *50*, 2890-2891.
- (4) Bock, E.; Wasylishen, R.; Gaboury, B. E.; Tomchuk, E. Electric Dipole Moments and Conformations of ortho-, meta-, and para-Fluoroacetophenones and of ortho-, meta-, and para-Trifluoromethylacetophenones. *Can. J. Chem.* **1973**, *51*, 1906-1909.
